# Supplementary material
Source: MDPI journal article supplement (https://www.mdpi.com/2073-4441/13/21/3137)
Supplement: s1 [file s1]

# Supplementary material

## A strontium and hydro-geochemical perspective on human impacted tributary of the Mekong River Basin: Sources identification, fluxes, and CO<sub>2</sub> consumption

Shitong Zhang <sup>1</sup>, Guilin Han <sup>1,\*</sup>, Jie Zeng <sup>1</sup>, Xuhuan Xiao <sup>1</sup> and Fairda Malem <sup>2</sup>

<sup>1</sup> Institute of Earth Sciences, China University of Geosciences (Beijing), Beijing 100083, China; stongzhang0103@cugb.edu.cn (S.Z.); zengjie@cugb.edu.cn (J.Z.); xiaoxuhuan@email.cugb.edu.cn (X.X.)

<sup>2</sup> Environmental Research and Training Center, Department of Environmental Quality Promotion, Ministry of Natural Resources and Environment, Klong Luang, Pathumthani 12120, Thailand; mfairda@yahoo.com (F.M.)

\* Correspondence: hanguilin@cugb.edu.cn; Tel.: +86-10-8232-3536

**Figure S1.** Land use and statistical data of agriculture/industry change in the MRB.

**Table S1.** The concentration of dissolved ions and strontium isotopes in the Mun River.

**Table S2.** Descriptive statistics of the detected physicochemical parameters in the MRB.

**Table S3.** The results of One-way ANOVA analysis on detected chemical parameters in the MRB.

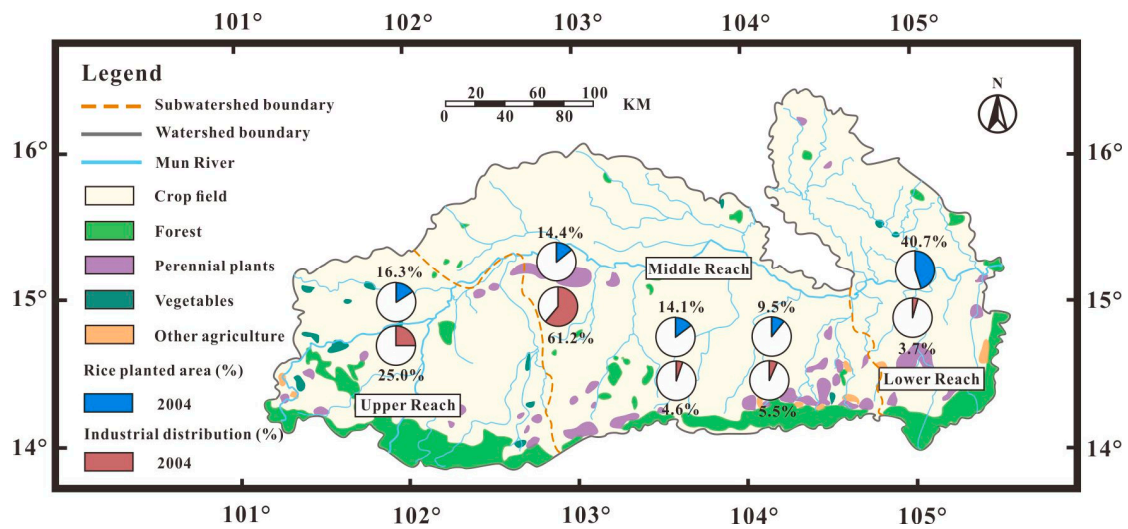

**Figure S1.** Land use and statistical data of agriculture/industry change in the MRB. The data of pie charts were derived from [1].

**Table S1.** The concentration of dissolved ions and strontium isotopes in the Mun River.

| Num                 | T    | pH   | TDS  | DO   | Na <sup>+</sup> | K <sup>+</sup> | Mg <sup>2+</sup> | Ca <sup>2+</sup> | Cl <sup>-</sup> | NO <sub>3</sub> <sup>-</sup> | SO <sub>4</sub> <sup>2-</sup> | HCO <sub>3</sub> <sup>-</sup> | SiO <sub>2</sub> | Sr    | <sup>87</sup> Sr/ <sup>86</sup> Sr | 2σ <sup>1</sup> |
|---------------------|------|------|------|------|-----------------|----------------|------------------|------------------|-----------------|------------------------------|-------------------------------|-------------------------------|------------------|-------|------------------------------------|-----------------|
|                     | °C   |      | mg/L | mg/L | mg/L            | mg/L           | mg/L             | mg/L             | mg/L            | mg/L                         | mg/L                          | mg/L                          | mg/L             | μg/L  |                                    |                 |
| <b>Upper Reach</b>  |      |      |      |      |                 |                |                  |                  |                 |                              |                               |                               |                  |       |                                    |                 |
| U1                  | 28.3 | 7.09 | 62   | 6.8  | 4.6             | 2.3            | 2.0              | 9.3              | 2.8             | 0.03                         | 2.3                           | 47.6                          | 14.4             | 48.3  | 0.7093                             | 12              |
| U2                  | 26.7 | 7.87 | 397  | 7.2  | 14.1            | 2.6            | 9.6              | 103.5            | 19.2            | 0.83                         | 9.8                           | 362.3                         | 19.0             | 338.4 | 0.7092                             | 13              |
| U3                  | 28.8 | 8.51 | 209  | 11.8 | 18.1            | 4.9            | 7.1              | 38.0             | 19.2            | 0.56                         | 9.0                           | 158.3                         | 3.6              | 231.3 | 0.7102                             | 12              |
| U4                  | 26.0 | 8.15 | 222  | 7.4  | 17.7            | 5.0            | 7.1              | 42.4             | 18.2            | 0.39                         | 8.5                           | 173.9                         | 4.5              | 236.6 | 0.7104                             | 13              |
| U5                  | 26.2 | 7.44 | 325  | 7.0  | 38.8            | 7.7            | 8.1              | 46.9             | 45.6            | 0.09                         | 15.6                          | 200.4                         | 7.8              | 261.6 | 0.7132                             | 14              |
| U6                  | 26.7 | 7.79 | 325  | 7.2  | 41.1            | 7.1            | 8.3              | 48.3             | 48.8            | 0.33                         | 17.5                          | 201.3                         | 8.3              | 264.3 | 0.7132                             | 13              |
| U7                  | 27.6 | 7.33 | 397  | 5.6  | 84.0            | 12.7           | 8.7              | 22.5             | 126.7           | 0.10                         | 16.1                          | 115.3                         | 12.2             | 176.8 | 0.7149                             | 9               |
| U8                  | 28.4 | 7.66 | 598  | 7.4  | 134.8           | 14.1           | 11.6             | 30.0             | 215.7           | 0.02                         | 18.3                          | 146.4                         | 8.0              | 187.5 | 0.7149                             | 11              |
| U9                  | 30.5 | 7.65 | 748  | 6.9  | 169.3           | 9.7            | 11.4             | 38.7             | 256.0           | 0.03                         | 7.9                           | 159.2                         | 14.2             | 165.9 | 0.7156                             | 11              |
| U10                 | 28.2 | 7.92 | 384  | 7.6  | 81.5            | 5.1            | 6.7              | 22.7             | 126.2           | 0.03                         | 22.6                          | 96.1                          | 11.7             | 152.7 | 0.7162                             | 11              |
| U11                 | 29.8 | 7.82 | 1456 | 8.2  | 369.6           | 6.9            | 16.2             | 62.5             | 668.5           | 0.99                         | 6.5                           | 174.8                         | 13.5             | 40.5  | 0.7111                             | 12              |
| U12                 | 26.4 | 7.27 | 186  | 5.9  | 16.0            | 5.5            | 10.3             | 24.8             | 14.5            | 0.14                         | 17.0                          | 124.4                         | 11.9             | 195.5 | 0.7085                             | 13              |
| U13                 | 28.1 | 7.40 | 192  | 5.2  | 26.6            | 5.2            | 5.5              | 18.6             | 56.4            | 0.03                         | 2.2                           | 63.1                          | 11.9             | 62.5  | 0.7118                             | 12              |
| U14                 | 28.3 | 6.96 | 44   | 7.2  | 2.6             | 3.1            | 2.1              | 4.6              | 4.5             | 0.05                         | 1.4                           | 28.4                          | 5.3              | 43.1  | 0.7131                             | 9               |
| U15                 | 28.0 | 6.78 | 105  | 3.3  | 14.6            | 4.4            | 4.4              | 8.2              | 18.7            | 0.03                         | 2.7                           | 53.1                          | 9.6              | 76.0  | 0.7194                             | 12              |
| U16                 | 28.2 | 7.54 | 213  | 5.1  | 39.5            | 10.6           | 5.3              | 10.9             | 49.9            | 0.03                         | 13.0                          | 80.5                          | 10.5             | 101.8 | 0.7168                             | 9               |
| U17                 | 26.8 | 7.70 | 189  | 6.6  | 26.3            | 5.1            | 7.5              | 22.1             | 27.6            | 0.03                         | 4.6                           | 120.8                         | 11.3             | 152.7 | 0.7109                             | 10              |
| U18                 | 29.8 | 7.40 | 53   | 10.3 | 3.5             | 2.8            | 2.7              | 5.9              | 5.7             | 0.03                         | 0.6                           | 35.7                          | 4.3              | 248.2 | 0.7128                             | 12              |
| <b>Middle Reach</b> |      |      |      |      |                 |                |                  |                  |                 |                              |                               |                               |                  |       |                                    |                 |
| M1                  | 28.3 | 7.63 | 579  | 6.5  | 141.2           | 6.1            | 7.9              | 27.6             | 235.1           | 0.13                         | 17.5                          | 92.4                          | 11.9             | 175.2 | 0.7168                             | 13              |
| M2                  | 26.5 | 6.91 | 105  | 3.8  | 19.3            | 2.5            | 3.3              | 8.7              | 18.2            | 0.04                         | 1.9                           | 55.8                          | 11.2             | 74.5  | 0.7219                             | 13              |
| M3                  | 28.1 | 7.47 | 683  | 5.2  | 169.3           | 5.7            | 7.4              | 32.4             | 282.1           | 0.08                         | 31.3                          | 78.7                          | 17.3             | 278.6 | 0.7196                             | 11              |
| M4                  | 25.6 | 7.76 | 839  | 6.5  | 213.7           | 5.1            | 8.4              | 43.3             | 361.6           | 0.66                         | 40.8                          | 83.3                          | 13.3             | 291.1 | 0.7154                             | 10              |
| M5                  | 26.9 | 7.47 | 624  | 6.0  | 161.5           | 4.0            | 6.2              | 23.8             | 270.4           | 0.05                         | 13.7                          | 72.3                          | 12.4             | 244.6 | 0.7223                             | 11              |
| M6                  | 26.7 | 8.46 | 358  | 8.7  | 82.5            | 3.4            | 5.1              | 18.0             | 136.5           | 0.18                         | 5.7                           | 69.5                          | 7.1              | 133.9 | 0.7214                             | 10              |
| M7                  | 29.3 | 7.91 | 288  | 7.7  | 67.5            | 3.0            | 4.3              | 14.4             | 107.3           | 0.41                         | 2.5                           | 57.6                          | 8.8              | 110.7 | 0.7191                             | 10              |
| M8                  | 29.6 | 7.13 | 113  | 7.5  | 20.6            | 3.0            | 2.6              | 7.7              | 34.5            | 0.04                         | 1.9                           | 32.0                          | 10.7             | 66.1  | 0.7085                             | 10              |
| M9                  | 25.5 | 6.62 | 139  | 6.4  | 36.1            | 1.7            | 1.5              | 1.3              | 58.0            | 0.07                         | 2.2                           | 7.3                           | 4.6              | 31.1  | 0.7096                             | 11              |
| M10                 | 26.7 | 7.69 | 345  | 7.1  | 86.7            | 2.9            | 3.9              | 11.2             | 146.2           | 0.06                         | 3.3                           | 39.3                          | 6.9              | 98.2  | 0.7192                             | 9               |
| M11                 | 31.3 | 6.88 | 170  | 5.7  | 31.8            | 4.8            | 1.9              | 14.8             | 16.8            | 0.24                         | 52.5                          | 39.3                          | 21.3             | 93.8  | 0.7281                             | 11              |
| M12                 | 29.9 | 6.11 | 53   | 3.9  | 9.1             | 2.0            | 1.2              | 5.6              | 8.9             | 0.04                         | 1.2                           | 28.4                          | 6.7              | 34.6  | 0.7095                             | 11              |
| M13                 | 26.2 | 7.23 | 174  | 6.3  | 21.5            | 2.6            | 3.2              | 25.6             | 68.0            | 0.18                         | 3.2                           | 22.9                          | 4.9              | 344.6 | 0.7113                             | 10              |
| M14                 | 31.2 | 6.68 | 46   | 7.7  | 6.7             | 1.5            | 0.8              | 3.1              | 10.9            | 0.07                         | 1.1                           | 16.5                          | 7.8              | 31.3  | 0.7098                             | 10              |
| M15                 | 24.0 | 7.86 | 748  | 8.2  | 187.9           | 5.1            | 8.4              | 30.2             | 330.7           | 0.03                         | 17.2                          | 86.0                          | 10.7             | 217.9 | 0.7196                             | 12              |
| M16                 | 26.8 | 7.55 | 384  | 4.7  | 92.6            | 3.3            | 5.0              | 17.0             | 159.0           | 0.13                         | 2.9                           | 58.6                          | 9.5              | 124.1 | 0.7214                             | 10              |
| M17                 | 31.2 | 6.30 | 38   | 7.0  | 4.3             | 2.2            | 1.2              | 2.2              | 8.8             | 0.69                         | 0.4                           | 13.7                          | 7.3              | 23.9  | 0.7115                             | 14              |
| M18                 | 30.1 | 6.98 | 172  | 7.6  | 37.1            | 3.5            | 2.2              | 8.3              | 54.4            | 0.03                         | 5.6                           | 33.9                          | 7.3              | 63.1  | 0.7093                             | 11              |
| M19                 | 28.4 | 7.22 | 114  | 4.1  | 8.4             | 6.8            | 3.2              | 9.9              | 18.3            | 0.07                         | 3.5                           | 56.7                          | 12.6             | 95.5  | 0.7269                             | 12              |
| <b>Lower Reach</b>  |      |      |      |      |                 |                |                  |                  |                 |                              |                               |                               |                  |       |                                    |                 |
| L1                  | 30.4 | 7.42 | 299  | 6.3  | 64.4            | 3.8            | 5.1              | 19.2             | 108.7           | 0.05                         | 4.4                           | 66.8                          | 8.5              | 152.7 | 0.7152                             | 12              |
| L2                  | 28.9 | 7.72 | 150  | 6.4  | 22.7            | 3.4            | 3.6              | 17.3             | 28.2            | 0.22                         | 5.7                           | 68.6                          | 8.4              | 91.1  | 0.7189                             | 13              |
| L3                  | 29.3 | 7.79 | 152  | 6.3  | 22.9            | 3.4            | 3.6              | 17.1             | 29.7            | 0.10                         | 5.6                           | 71.4                          | 8.2              | 92.0  | 0.7184                             | 11              |
| L4                  | 29.9 | 7.62 | 157  | 6.1  | 24.2            | 3.6            | 3.8              | 18.3             | 30.1            | 0.03                         | 6.5                           | 72.3                          | 8.3              | 94.6  | 0.7198                             | 11              |
| L5                  | 29.7 | 6.47 | 28   | 6.2  | 3.7             | 1.6            | 0.7              | 3.5              | 2.7             | 0.27                         | 1.1                           | 16.5                          | 5.7              | 24.3  | 0.7103                             | 9               |
| L6                  | 30.4 | 7.64 | 164  | 7.1  | 26.2            | 3.7            | 3.9              | 19.1             | 32.5            | 0.04                         | 6.8                           | 74.1                          | 8.4              | 99.1  | 0.7198                             | 13              |

|     |      |      |     |     |      |     |     |      |       |      |      |      |      |       |        |    |
|-----|------|------|-----|-----|------|-----|-----|------|-------|------|------|------|------|-------|--------|----|
| L7  | 30.4 | 7.34 | 152 | 6.7 | 24.5 | 3.5 | 3.6 | 17.3 | 30.4  | 0.05 | 6.3  | 69.0 | 7.7  | 93.8  | 0.7207 | 96 |
| L8  | 30.1 | 6.30 | 14  | 7.8 | 1.3  | 1.2 | 0.5 | 1.1  | 1.7   | 0.38 | 0.8  | 7.9  | 4.4  | 8.7   | 0.7121 | 12 |
| L9  | 27.7 | 7.59 | 163 | 7.6 | 9.0  | 2.5 | 8.8 | 26.9 | 16.0  | 0.52 | 17.8 | 96.6 | 10.0 | 137.5 | 0.7182 | 9  |
| L10 | 30.6 | 7.10 | 208 | 7.1 | 50.7 | 1.5 | 3.0 | 8.5  | 73.4  | 0.28 | 5.4  | 37.5 | 12.7 | 50.5  | 0.7108 | 9  |
| L11 | 28.8 | 7.24 | 146 | 6.8 | 22.2 | 3.4 | 3.6 | 17.4 | 27.3  | 0.31 | 5.8  | 70.5 | 8.3  | 90.2  | 0.7221 | 12 |
| L12 | 31.0 | 7.18 | 332 | 7.2 | 88.6 | 1.7 | 2.5 | 8.9  | 136.8 | 0.03 | 12.7 | 31.1 | 13.3 | 63.5  | 0.7109 | 9  |
| L13 | 28.7 | 7.67 | 128 | 6.5 | 31.6 | 1.3 | 2.2 | 3.8  | 48.7  | 0.34 | 1.9  | 19.2 | 7.5  | 35.0  | 0.7096 | 10 |
| L14 | 33.0 | 7.90 | 122 | 7.9 | 16.3 | 2.3 | 2.7 | 15.6 | 23.5  | 0.26 | 3.0  | 58.2 | 7.9  | 130.4 | 0.7217 | 67 |
| L15 | 29.8 | 7.90 | 234 | 7.8 | 45.4 | 3.3 | 4.5 | 21.1 | 63.3  | 0.29 | 10.3 | 74.1 | 9.9  | 86.3  | 0.7189 | 11 |
| L16 | 29.2 | 7.52 | 152 | 7.2 | 24.1 | 3.3 | 3.6 | 17.0 | 30.9  | 0.03 | 5.5  | 67.3 | 7.5  | 92.0  | 0.7177 | 8  |
| L17 | 29.3 | 7.57 | 150 | 6.2 | 21.9 | 3.5 | 3.7 | 17.5 | 27.5  | 0.29 | 6.0  | 73.2 | 8.5  | 92.9  | 0.7221 | 9  |
| L18 | 29.4 | 6.92 | 69  | 4.0 | 6.3  | 6.3 | 1.8 | 7.9  | 9.9   | 0.24 | 1.2  | 39.3 | 7.9  | 60.9  | 0.7094 | 10 |
| L19 | 30.6 | 7.59 | 155 | 8.0 | 24.8 | 3.5 | 3.7 | 17.5 | 31.5  | 0.15 | 5.9  | 69.0 | 7.6  | 92.9  | 0.7249 | 9  |

Note: <sup>1</sup> **2 $\sigma$  represents the double Standard Deviation (2SD).** The hydrochemistry data were derived from [1].

**Table S2.** Descriptive statistics of the detected physicochemical parameters in the MRB.

| Parameter<br>s                     | Units | Upper reach ( <i>n</i> <sup>1</sup> = 18) |       |       |                  | Middle reach ( <i>n</i> = 19) |       |       |       | Lower reach ( <i>n</i> = 19) |       |       |      |
|------------------------------------|-------|-------------------------------------------|-------|-------|------------------|-------------------------------|-------|-------|-------|------------------------------|-------|-------|------|
|                                    |       | Min                                       | Max   | Mean  | cv% <sup>2</sup> | Min                           | Max   | Mean  | cv%   | Min                          | Max   | Mean  | cv%  |
| pH                                 |       | 6.8                                       | 8.5   | 7.6   | 5.6              | 6.1                           | 8.5   | 7.3   | 8.2   | 6.3                          | 7.9   | 7.4   | 6.0  |
| TDS                                | mg/L  | 44.2                                      | 1456  | 339.0 | 98.7             | 38.4                          | 838.5 | 314.1 | 82.4  | 13.7                         | 331.5 | 156.5 | 49.1 |
| DO                                 | mg/L  | 3.3                                       | 11.8  | 7.0   | 26.9             | 3.8                           | 8.7   | 6.3   | 23.1  | 4.0                          | 8.0   | 6.8   | 13.8 |
| Na <sup>+</sup>                    | mg/L  | 2.6                                       | 369.6 | 61.3  | 146.6            | 4.3                           | 213.7 | 73.6  | 93.7  | 1.3                          | 88.6  | 27.9  | 76.7 |
| K <sup>+</sup>                     | mg/L  | 2.3                                       | 14.1  | 6.4   | 53.5             | 1.5                           | 6.8   | 3.6   | 41.9  | 1.2                          | 6.3   | 3.0   | 40.5 |
| Mg <sup>2+</sup>                   | mg/L  | 2.0                                       | 16.2  | 7.5   | 48.5             | 0.8                           | 8.4   | 4.1   | 62.1  | 0.5                          | 8.8   | 3.4   | 51.7 |
| Ca <sup>2+</sup>                   | mg/L  | 4.6                                       | 103.5 | 31.1  | 78.7             | 1.3                           | 43.3  | 16.1  | 72.4  | 1.1                          | 26.9  | 14.5  | 47.2 |
| Cl <sup>-</sup>                    | mg/L  | 2.8                                       | 668.5 | 95.8  | 167.7            | 8.8                           | 361.6 | 122.4 | 97.0  | 1.7                          | 136.8 | 39.6  | 87.0 |
| NO <sub>3</sub> <sup>-</sup>       | mg/L  | 0.02                                      | 1.0   | 0.21  | 143.9            | 0.03                          | 0.69  | 0.17  | 119.7 | 0.03                         | 0.52  | 0.20  | 70.0 |
| SO <sub>4</sub> <sup>2-</sup>      | mg/L  | 0.6                                       | 22.6  | 9.7   | 70.2             | 0.4                           | 52.5  | 11.0  | 136.3 | 0.8                          | 17.8  | 5.9   | 69.7 |
| HCO <sub>3</sub> <sup>-</sup>      | mg/L  | 28.4                                      | 362.3 | 130.1 | 61.9             | 7.3                           | 92.4  | 49.7  | 52.8  | 7.9                          | 96.6  | 57.0  | 42.4 |
| Sr                                 | μg/L  | 40.5                                      | 338.4 | 165.8 | 53.6             | 23.9                          | 344.6 | 133.3 | 73.4  | 8.7                          | 152.7 | 83.6  | 43.9 |
| <sup>87</sup> Sr/ <sup>86</sup> Sr |       | 0.709                                     | 0.719 | 0.713 | 0.42             | 0.708                         | 0.728 | 0.717 | 0.87  | 0.709                        | 0.725 | 0.717 | 0.69 |

Note: <sup>1</sup> *n* represents number of samples. <sup>2</sup> cv% represents the percent of the Coefficient of Variance.

**Table S3.** The results of One-way ANOVA analysis on detected chemical parameters in the MRB.

|                     | Na <sup>+</sup> | K <sup>+</sup> | Mg <sup>2+</sup> | Ca <sup>2+</sup> | Cl <sup>-</sup> | NO <sub>3</sub> <sup>-</sup> | SO <sub>4</sub> <sup>2-</sup> | HCO <sub>3</sub> <sup>-</sup> | Sr     |
|---------------------|-----------------|----------------|------------------|------------------|-----------------|------------------------------|-------------------------------|-------------------------------|--------|
| <b>Upper reach</b>  |                 |                |                  |                  |                 |                              |                               |                               |        |
| F                   | 0.002           | 1.064          | 0.563            | 3.611            | 0.052           | 0.267                        | 5.497                         | 5.754                         | 6.116  |
| Sig.                | 0.965           | 0.318          | 0.464            | 0.076            | 0.822           | 0.613                        | 0.032*                        | 0.029*                        | 0.025* |
| <b>Middle reach</b> |                 |                |                  |                  |                 |                              |                               |                               |        |
| F                   | 4.471           | 1.226          | 6.944            | 4.237            | 3.866           | 0.301                        | 0.720                         | 9.629                         | 2.299  |
| Sig.                | 0.050*          | 0.284          | 0.017*           | 0.055            | 0.066           | 0.590                        | 0.408                         | 0.006*                        | 0.148  |
| <b>Lower reach</b>  |                 |                |                  |                  |                 |                              |                               |                               |        |
| F                   | 0.515           | 0.011          | 0.435            | 0.037            | 0.495           | 2.827                        | 1.358                         | 0.030                         | 0.024  |
| Sig.                | 0.483           | 0.917          | 0.518            | 0.850            | 0.491           | 0.111                        | 0.260                         | 0.865                         | 0.880  |

Note: \* means that there were significant differences between the concentrations of dissolved ions in the mainstream and those in tributaries. Sig. means the significance value of each ion. Statistical significance was at the level of  $p < 0.05$ .

## References

1. Liu, J.; Han, G.; Liu, X.; Liu, M.; Song, C.; Yang, K.; Li, X.; Zhang, Q. Distributive characteristics of riverine nutrients in the Mun River, northeast Thailand: Implications for Anthropogenic Inputs. *Water* **2019**, *11*, 954.
